# Supplementary material for: Multimorbidity and mortality: A data science perspective
Source: PubMed Central journal article supplement — J Multimorb Comorb. 2022 Jun 1;12:26335565221105431. doi: 10.1177/26335565221105431 (PMC9163746; doi:10.1177/26335565221105431), 2022-06-01
Supplement: sj-pdf-1-cob-10.1177_26335565221105431.pdf [file sj-pdf-1-cob-10.1177_26335565221105431.pdf]

# **Multimorbidity and Mortality: A Data Science Perspective (Supplementary Material)**

# A Definitions

**Table 1. Age groups based on MeSH definitions.**

| <b>Group</b> | <b>Age</b>        |
|--------------|-------------------|
| Infant       | 0 to 2 years      |
| Child        | 2 to 13 years     |
| Adolescent   | 13 to 19 years    |
| Adult        | 19 to 45 years    |
| Middle-Aged  | 45 to 65 years    |
| Aged         | 65 to 80 years    |
| Elderly      | 80 years and over |

**Table 2. List of morbidities and MedDRA System Organ Classes.**

| <b>No.</b> | <b>Disease</b>          | <b>MedDRA</b>                                   | <b>Abbrv.</b> |
|------------|-------------------------|-------------------------------------------------|---------------|
| 1          | Angina                  | Cardiac Disorders                               | Card          |
| 2          | Atrial Fibrillation     | Cardiac Disorders                               | Card          |
| 3          | Coronary Artery Disease | Cardiac Disorders                               | Card          |
| 4          | Cardiac Arrhythmia      | Cardiac Disorders                               | Card          |
| 5          | Heart Failure           | Cardiac Disorders                               | Card          |
| 6          | Heart Valve Disorder    | Cardiac Disorders                               | Card          |
| 7          | Myocardial Infarction   | Cardiac Disorders                               | Card          |
| 8          | Cardiac-related         | Cardiac Disorders                               | Card          |
| 9          | Thyroid Cancer          | Endocrine Disorders                             | En            |
| 10         | Esophageal Cancer       | Gastrointestinal Disorders                      | GI            |
| 11         | Stomach Cancer          | Gastrointestinal Disorders                      | GI            |
| 12         | Liver Disease           | Hepatobiliary Disorders                         | Hep           |
| 13         | Liver-related           | Hepatobiliary Disorders                         | Hep           |
| 14         | Asthma                  | Immune System Disorders                         | Imm           |
| 15         | HIV/AIDS                | Immune System Disorders                         | Imm           |
| 16         | Multiple Sclerosis      | Immune System Disorders                         | Imm           |
| 17         | Diabetes                | Metabolism and Nutrition Disorders              | Me            |
| 18         | Lupus                   | Musculoskeletal and Connective Tissue Disorders | Mu            |
| 19         | Breast Cancer           | Neoplasms Benign, Malignant and Unspecified     | Neop          |
| 20         | Cervix Cancer           | Neoplasms Benign, Malignant and Unspecified     | Neop          |
| 21         | Colorectal Cancer       | Neoplasms Benign, Malignant and Unspecified     | Neop          |
| 22         | Leukemias               | Neoplasms Benign, Malignant and Unspecified     | Neop          |
| 23         | Liver Cancer            | Neoplasms Benign, Malignant and Unspecified     | Neop          |
| 24         | Lung Cancer             | Neoplasms Benign, Malignant and Unspecified     | Neop          |
| 25         | Melanoma                | Neoplasms Benign, Malignant and Unspecified     | Neop          |

|    |                                          |                                                 |      |
|----|------------------------------------------|-------------------------------------------------|------|
| 26 | Cancer-related                           | Neoplasms Benign, Malignant and Unspecified     | Neop |
| 27 | Pancreas Cancer                          | Neoplasms Benign, Malignant and Unspecified     | Neop |
| 28 | Encephalitis                             | Nervous System Disorders                        | Nerv |
| 29 | Parkinson's Disease                      | Nervous System Disorders                        | Nerv |
| 30 | Stroke                                   | Nervous System Disorders                        | Nerv |
| 31 | Stroke Related                           | Nervous System Disorders                        | Nerv |
| 32 | Dementia                                 | Psychiatric Disorders                           | Ps   |
| 33 | Bladder Cancer                           | Renal and Urinary Disorders                     | Ren  |
| 34 | Kidney Disease                           | Renal and Urinary Disorders                     | Ren  |
| 35 | Kidney-related                           | Renal and Urinary Disorders                     | Ren  |
| 36 | Ovarian Cancer                           | Reproductive System and Breast Disorders        | Repr |
| 37 | Prostate Cancer                          | Reproductive System and Breast Disorders        | Repr |
| 38 | Testicular Cancer                        | Reproductive System and Breast Disorders        | Repr |
| 39 | Uterus Cancer                            | Reproductive System and Breast Disorders        | Repr |
| 40 | Chronic Obstructive<br>Pulmonary Disease | Respiratory, Thoracic and Mediastinal Disorders | Res  |
| 41 | Respiratory-related                      | Respiratory, Thoracic and Mediastinal Disorders | Res  |
| 42 | Aortic Aneurysm                          | Vascular Disorders                              | Vas  |
| 43 | Hypertension                             | Vascular Disorders                              | Vas  |
| 44 | Other Aneurysms                          | Vascular Disorders                              | Vas  |
| 45 | Peripheral Artery Disease                | Vascular Disorders                              | Vas  |
| 46 | Transient Ischemic Attack                | Vascular Disorders                              | Vas  |

---

## B Sample Size for Index of Multiple Deprivation

| Millions          | 2008       | 2009        | 2010        | 2011        | 2012        | 2013        | 2014        | 2015        | 2016        |
|-------------------|------------|-------------|-------------|-------------|-------------|-------------|-------------|-------------|-------------|
| Total             | 5.1        | 5.1         | 5.0         | 5.0         | 4.9         | 4.6         | 4.2         | 3.5         | 3.1         |
| With IMD          | 0.3        | 2.1         | 2.2         | 2.1         | 2.1         | 1.9         | 1.8         | 1.4         | 1.2         |
| <i>% of Total</i> | <i>5.2</i> | <i>42.0</i> | <i>43.4</i> | <i>41.3</i> | <i>43.4</i> | <i>41.6</i> | <i>42.0</i> | <i>39.8</i> | <i>37.2</i> |

## **C Supplementary Figures**

Supplementary plots for all age groups and years at available at <https://doi.org/10.6084/m9.figshare.19799935.v1>.

## D Survival Analysis

**Table 3. Summary statistics of dataset used for survival analysis.**

| Proportion (%)        | 2010           |                |                | 2011           |                |                | 2012           |                |                |
|-----------------------|----------------|----------------|----------------|----------------|----------------|----------------|----------------|----------------|----------------|
|                       | Train          | Test           | All            | Train          | Test           | All            | Train          | Test           | All            |
| <i>Sex</i>            |                |                |                |                |                |                |                |                |                |
| Male                  | 44.8           | 44.9           | 44.9           | 44.9           | 45.0           | 44.9           | 45.0           | 45.3           | 45.1           |
| Female                | 55.2           | 55.1           | 55.1           | 55.1           | 55.0           | 55.1           | 55.0           | 54.7           | 54.9           |
| <i>Age Group</i>      |                |                |                |                |                |                |                |                |                |
| Aged                  | 71.6           | 71.6           | 71.6           | 71.3           | 71.2           | 71.3           | 71.6           | 71.5           | 71.5           |
| Elderly               | 28.4           | 28.4           | 28.4           | 28.7           | 28.8           | 28.7           | 28.4           | 28.5           | 28.5           |
| <i>IMD</i>            |                |                |                |                |                |                |                |                |                |
| 1                     | 25.4           | 25.4           | 25.4           | 25.3           | 25.5           | 25.4           | 25.5           | 25.5           | 25.5           |
| 2                     | 25.2           | 25.1           | 25.2           | 25.1           | 25.1           | 25.1           | 24.9           | 24.7           | 24.8           |
| 3                     | 21.7           | 21.6           | 21.7           | 21.6           | 21.5           | 21.6           | 21.5           | 21.4           | 21.4           |
| 4                     | 17.6           | 17.6           | 17.6           | 17.7           | 17.7           | 17.7           | 17.8           | 18.0           | 17.8           |
| 5                     | 10.2           | 10.3           | 10.3           | 10.3           | 10.2           | 10.2           | 10.3           | 10.4           | 10.4           |
| <i>Multimorbidity</i> |                |                |                |                |                |                |                |                |                |
| 0                     | 20.5           | 20.6           | 20.5           | 20.1           | 20.3           | 20.2           | 20.2           | 20.3           | 20.3           |
| 1                     | 27.2           | 27.1           | 27.2           | 27.0           | 26.8           | 26.9           | 26.7           | 26.8           | 26.7           |
| 2                     | 21.2           | 21.2           | 21.2           | 21.2           | 21.4           | 21.3           | 21.3           | 21.3           | 21.3           |
| 3                     | 13.7           | 13.6           | 13.7           | 13.8           | 13.8           | 13.8           | 13.8           | 13.7           | 13.8           |
| 4+                    | 17.4           | 17.5           | 17.4           | 17.9           | 17.7           | 17.9           | 18.0           | 17.9           | 17.9           |
| <i>Mortality</i>      |                |                |                |                |                |                |                |                |                |
|                       | 12.1           | 12.1           | 12.1           | 11.7           | 11.7           | 11.7           | 9.9            | 9.9            | 9.9            |
| <b>Total (Mil)</b>    | <b>261,862</b> | <b>112,226</b> | <b>374,088</b> | <b>273,596</b> | <b>117,255</b> | <b>390,851</b> | <b>271,812</b> | <b>116,490</b> | <b>388,302</b> |

**Table 4. Test set C-index of survival models.**

| Year | Test Set C-index (95% CI) |                      |                          |                         |
|------|---------------------------|----------------------|--------------------------|-------------------------|
|      | Cox                       | Regularized Cox      | Accelerated Failure Time | Neural Network Survival |
| 2010 | 0.793 (0.790, 0.797)      | 0.793 (0.790, 0.797) | 0.793 (0.790, 0.797)     | 0.794 (0.790, 0.797)    |
| 2011 | 0.798 (0.795, 0.802)      | 0.798 (0.795, 0.802) | 0.798 (0.795, 0.802)     | 0.798 (0.794, 0.801)    |
| 2012 | 0.807 (0.803, 0.811)      | 0.807 (0.804, 0.812) | 0.799 (0.795, 0.804)     | 0.806 (0.802, 0.810)    |

**Table 5. Top ten risk factors of the Cox Proportional Hazards model for 2012. Asterisks denote factors that are significant after the Benjamini-Hochberg adjustment.**

| Factor              | HR (95% CI)       |   |
|---------------------|-------------------|---|
| Pancreas Cancer     | 4.67 (3.61, 6.02) | * |
| Osophageal Cancer   | 4.42 (3.75, 5.22) | * |
| Lung Cancer         | 4.38 (3.99, 4.80) | * |
| Liver Cancer        | 4.35 (3.66, 5.16) | * |
| Multimorbidity (4+) | 2.44 (2.22, 2.69) | * |
| Dementia            | 2.28 (2.18, 2.39) | * |
| Ovarian Cancer      | 2.21 (1.84, 2.65) | * |
| Multimorbidity (3)  | 2.16 (2.00, 2.34) | * |
| Parkinson's Disease | 2.06 (1.91, 2.23) | * |

Multimorbidity (2) 1.89 (1.76, 2.02) \*
